# Supplementary material for: Characterizing the origin of excess dissolved organic carbon incoastal seawater using stable carbon isotope and light absorptioncharacteristics
Source: Copernicus journal article supplement (doi:10.5194/bg-2020-272), 2020-08-10
Supplement: Supplementary file 1 [file bg-2020-272-supplement.pdf]

## Supplementary information

# Characterizing the origin of excess dissolved organic carbon in coastal seawater using stable carbon isotope and light absorption characteristics

Heejun Han<sup>1</sup>, Jeomshik Hwang<sup>1</sup>, Guebuem Kim<sup>1</sup>

<sup>1</sup>School of Earth and Environmental Sciences/RIO, Seoul National University, Seoul, 08826, South Korea

*Correspondence to:* Guebuem Kim (gkim@snu.ac.kr)

### **This file includes:**

Figure S1

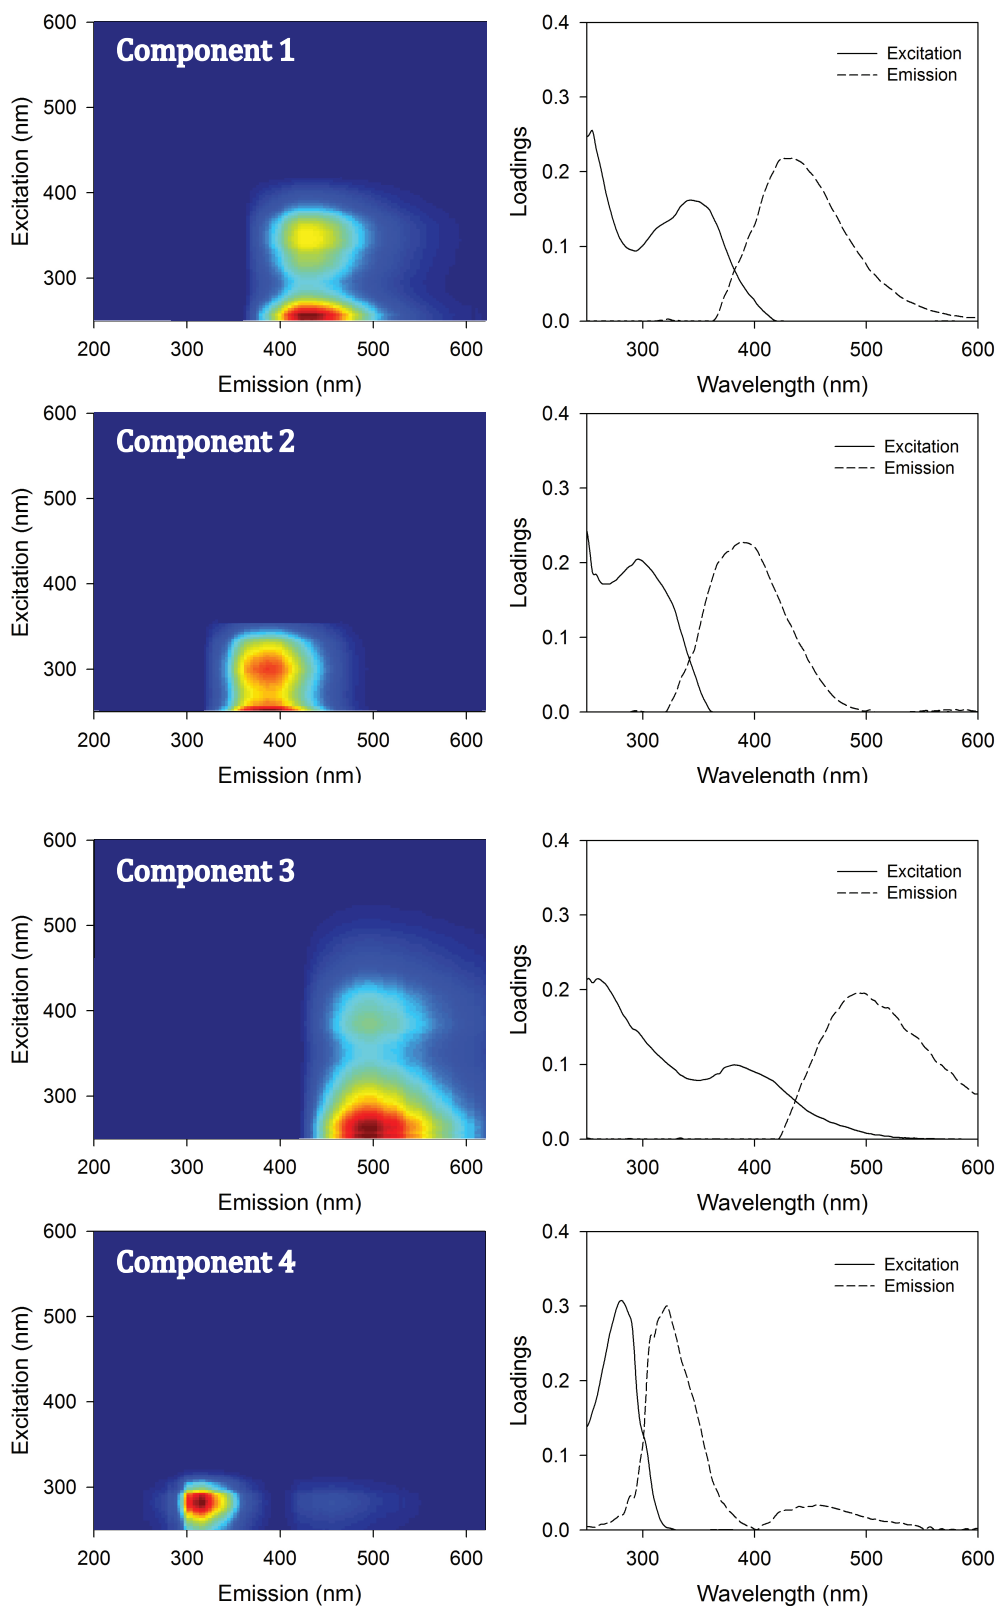

**Supplementary figure 1. Contour plots of fluorescence EEM spectra and excitation-emission loadings of terrestrial humic-like (C1 and C3), marine humic-like (C2), and protein-like (tryptophan; C3) components identified using the PARAFAC model in Sihwa.**
